# Supplementary material
Source: publisher site journal article supplement (https://www.dovepress.com/article/474368)
Supplement: Supplementary file 1 [file get_supplementary_file.php]

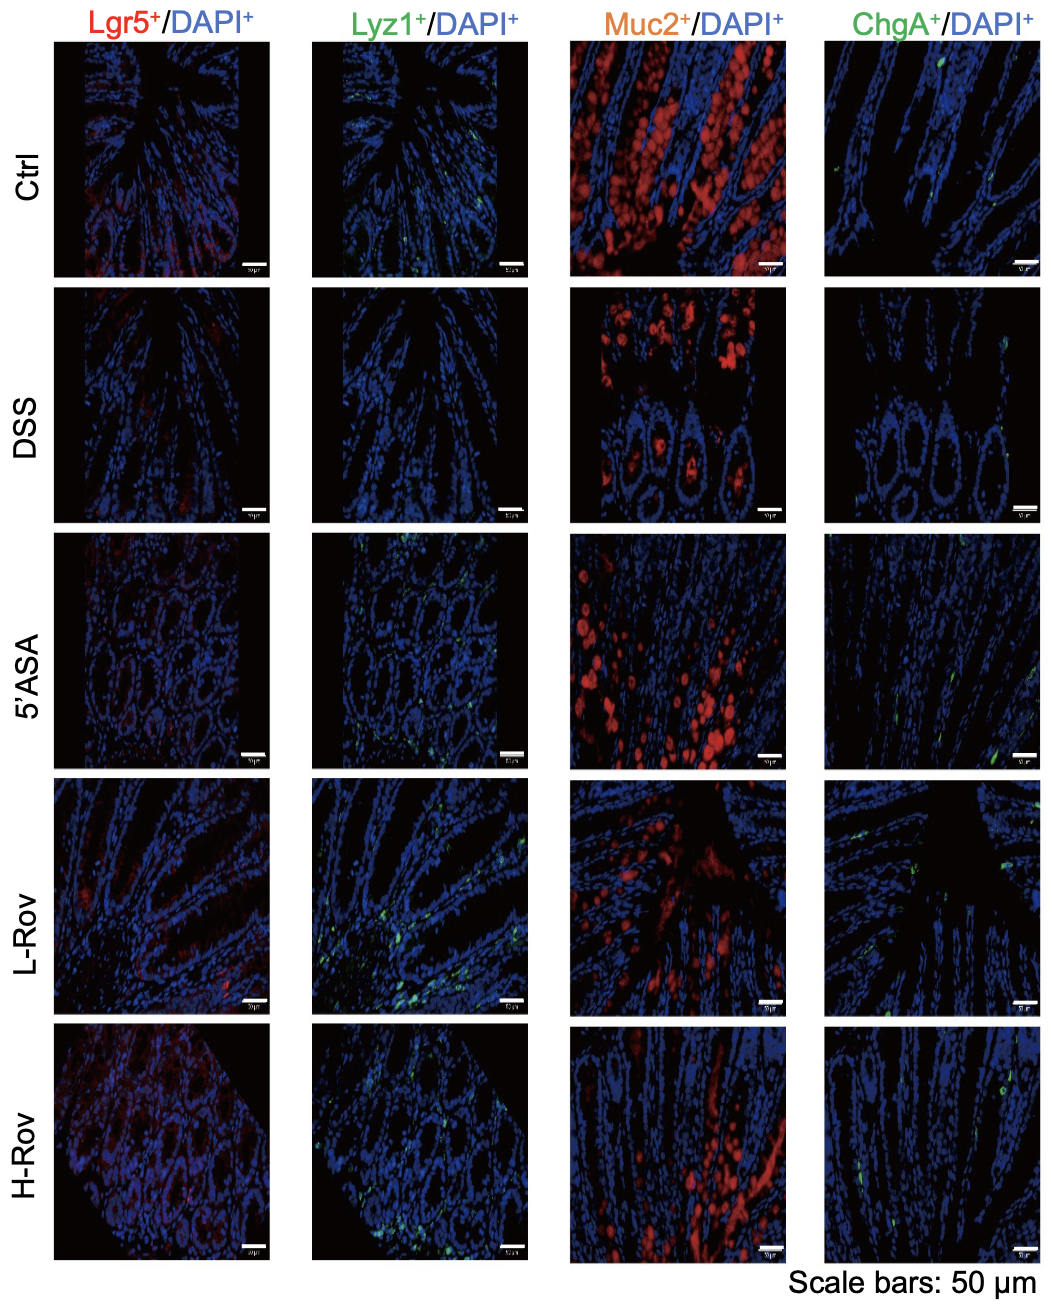


**Supplementary Fig. 1.** Rov restored intestinal repair by increasing the number of Lgr5+, Lyz1+ and Muc2+ cells in colon.

**Supplementary Fig. 2.** Rov increased the expression of *Defa5* in intestinal organoids and ileum of colitis mice. **p*<0.05, ****p*<0.001, *vs* TNF-a or Ctrl; ###*p*<0.001, *vs* DSS.

**Supplementary Table 1.** List of differential genes among groups using for heatmap analysis.

| gene_name | TNF-a+Rov vs Control | | TNF-a vs Control | | Rov vs Control | | TNF-a+Rov vs TNF-a | | |
| --- | --- | --- | --- | --- | --- | --- | --- | --- | --- |
| significant | regulate | significant | regulate | significant | regulate | significant | regulate | |
| Cfhr2 | no | down | no | up | yes | down | yes | down |  |
| Srcin1 | no | up | no | up | yes | up | yes | up |  |
| Ucn3 | yes | up | no | up | yes | up | yes | up |  |
| Ccdc187 | yes | up | yes | up | yes | up | yes | up |  |
| Prl2c3 | yes | down | no | up | yes | down | yes | down |  |
| Nlrp9b | yes | down | yes | down | yes | down | yes | up |  |
| Dynlt2a1 | no | no change | yes | up | yes | up | yes | down |  |
| H3c14 | no | down | yes | down | yes | down | yes | up |  |
|  | yes | up | no | up | yes | up | yes | up |  |
| Gm49323 | yes | down | no | down | yes | down | yes | down |  |
| Gm48415 | no | up | yes | down | yes | down | yes | up |  |
| Gm49273 | no | up | no | down | yes | down | yes | up |  |
| Gm50371 | yes | up | no | up | yes | up | yes | up |  |
| Cav2 | no | down | yes | up | no | up | yes | down |  |
| Gcg | yes | up | no | down | no | up | yes | up |  |
| Zfp385a | yes | down | no | down | no | down | yes | down |  |
| Aire | yes | up | no | up | no | up | yes | up |  |
| Slc5a5 | no | down | no | up | no | down | yes | down |  |
| S100a6 | yes | down | no | up | no | down | yes | down |  |
| Lrp3 | yes | up | no | up | no | up | yes | up |  |
| Vsig2 | no | up | no | down | no | up | yes | up |  |
| Pdzd4 | no | up | no | down | no | up | yes | up |  |
| Def6 | yes | down | no | down | no | down | yes | down |  |
| Peg3 | yes | up | no | up | no | down | yes | up |  |
| Lamb1 | yes | up | no | up | no | up | yes | up |  |
| Cyp2c29 | yes | down | yes | down | no | down | yes | down |  |
| Nqo1 | yes | down | yes | down | no | down | yes | down |  |
| Cacna1b | yes | up | no | up | no | up | yes | up |  |
| Etv1 | yes | up | no | down | no | down | yes | up |  |
| Pde1c | yes | up | yes | up | no | up | yes | up |  |
| Sst | no | down | yes | down | no | down | yes | up |  |
| Col26a1 | no | down | yes | down | no | down | yes | up |  |
| Nes | no | up | no | down | no | up | yes | up |  |
| Chd5 | no | up | yes | down | no | down | yes | up |  |
| Dnah2 | yes | down | yes | down | no | down | yes | down |  |
| Il5ra | no | up | yes | up | no | up | yes | down |  |
| Nid1 | no | down | yes | up | no | down | yes | down |  |
| Fcer2a | no | up | no | down | no | down | yes | up |  |
| Kit | yes | up | no | up | no | up | yes | up |  |
| Susd2 | yes | up | no | up | no | down | yes | up |  |
| Slc4a3 | no | up | no | down | no | down | yes | up |  |
| Runx1t1 | yes | up | no | up | no | up | yes | up |  |
| Odad4 | no | down | yes | down | no | up | yes | up |  |
| Brme1 | no | up | no | down | no | up | yes | up |  |
| Syn2 | yes | up | no | up | no | up | yes | up |  |
| Kif19a | yes | up | yes | up | no | up | yes | up |  |
| Zmynd10 | no | down | no | up | no | up | yes | down |  |
| Rdm1 | no | up | no | down | no | up | yes | up |  |
| Adssl1 | no | down | yes | down | no | up | yes | up |  |
| Zfp651 | yes | up | no | up | no | up | yes | up |  |
| Klhl3 | no | up | yes | down | no | up | yes | up |  |
| Gip | no | up | yes | down | no | up | yes | up |  |
| Kif1a | yes | up | no | up | no | up | yes | up |  |
| Cltrn | no | down | yes | down | no | down | yes | up |  |
| Fam163a | no | up | no | down | no | up | yes | up |  |
| Tnr | yes | up | no | up | no | up | yes | up |  |
| Fam184b | yes | up | no | up | no | up | yes | up |  |
| Il17rb | no | down | yes | down | no | down | yes | up |  |
| Sertad4 | yes | up | yes | up | no | up | yes | up |  |
| Col20a1 | yes | down | yes | down | no | down | yes | up |  |
| Cd274 | yes | up | no | up | no | down | yes | up |  |
| Slpi | no | down | no | up | no | down | yes | down |  |
| Cntnap1 | yes | up | yes | up | no | down | yes | up |  |
| Rhbdl3 | yes | up | yes | up | no | down | yes | up |  |
| Wfdc2 | yes | down | no | up | no | up | yes | down |  |
| Slc12a5 | no | up | no | down | no | down | yes | up |  |
| Pltp | yes | down | no | down | no | down | yes | down |  |
| Sgk2 | no | down | yes | up | no | down | yes | down |  |
| Kcnab3 | yes | down | yes | down | no | down | yes | up |  |
| Wnt9b | yes | up | yes | up | no | up | yes | down |  |
| Dnah11 | yes | up | yes | up | no | up | yes | up |  |
| Mmp20 | yes | up | no | down | no | down | yes | up |  |
| Mmp7 | yes | up | no | up | no | up | yes | up |  |
| Copz2 | no | up | no | down | no | down | yes | up |  |
| Ccl9 | yes | up | no | up | no | down | yes | up |  |
| Rps6kl1 | no | down | no | up | no | up | yes | down |  |
| Lrp11 | yes | up | no | up | no | down | yes | up |  |
| Btbd11 | yes | up | no | up | no | up | yes | up |  |
| Timp3 | no | down | yes | down | no | up | yes | up |  |
| Slc5a8 | no | up | no | down | no | down | yes | up |  |
| Vsir | no | up | no | down | no | up | yes | up |  |
| Acsl6 | no | up | no | down | no | up | yes | up |  |
| Adcy1 | yes | up | yes | up | no | up | yes | up |  |
| Rgs9 | yes | up | yes | up | no | up | yes | up |  |
| Trib2 | no | up | no | down | no | up | yes | up |  |
| Rsad2 | yes | up | yes | up | no | up | yes | up |  |
| Ace | yes | down | no | down | no | down | yes | down |  |
| Cep112 | yes | up | no | up | no | up | yes | up |  |
| Myh10 | no | up | no | down | no | down | yes | up |  |
| Ntn1 | yes | up | no | no change | no | up | yes | up |  |
| Pygl | no | down | yes | down | no | down | yes | up |  |
| Chga | yes | up | no | up | no | up | yes | up |  |
| Dpf3 | no | down | yes | down | no | up | yes | up |  |
| Gng4 | yes | up | no | down | no | up | yes | up |  |
| Serpinb9b | no | down | yes | up | no | down | yes | down |  |
| Slc6a19 | yes | down | yes | down | no | down | yes | down |  |
| Pcsk1 | no | up | no | down | no | up | yes | up |  |
| Rab3c | yes | up | no | up | no | up | yes | up |  |
| Cdhr1 | no | down | yes | down | no | up | yes | up |  |
| Peli2 | yes | up | no | down | no | up | yes | up |  |
| Ogdhl | no | up | no | down | no | up | yes | up |  |
| Anxa8 | yes | down | no | down | no | up | yes | down |  |
| Clu | no | up | yes | up | no | up | yes | down |  |
| Nefm | no | up | no | down | no | down | yes | up |  |
| Nefl | yes | up | no | up | no | up | yes | up |  |
| Slc22a17 | no | up | no | down | no | up | yes | up |  |
| Tgm1 | no | down | no | up | no | up | yes | down |  |
| Psca | yes | down | no | down | no | down | yes | down |  |
| Tmprss15 | no | down | no | up | no | down | yes | down |  |
| Dhh | no | up | yes | up | no | up | yes | down |  |
| Scn8a | no | down | yes | down | no | down | yes | up |  |
| Sncg | yes | down | no | down | no | down | yes | down |  |
| Scg5 | yes | up | no | up | no | down | yes | up |  |
| Mx2 | yes | up | no | up | no | down | yes | up |  |
| Tff2 | yes | up | no | up | no | up | yes | up |  |
| Tff1 | no | down | no | up | no | up | yes | down |  |
| Cyp1b1 | yes | up | yes | up | no | down | yes | down |  |
| Cacna1h | no | up | no | down | no | up | yes | up |  |
| Pdia2 | no | down | yes | down | no | up | yes | up |  |
| Clps | yes | up | yes | up | no | up | yes | up |  |
| Mep1b | no | down | no | up | no | up | yes | down |  |
| Sting1 | no | up | no | down | no | up | yes | up |  |
| Setbp1 | yes | up | no | down | no | up | yes | up |  |
| Anxa1 | no | down | yes | up | no | up | yes | down |  |
| Il33 | no | down | no | up | no | up | yes | down |  |
| Peli3 | no | up | no | down | no | up | yes | up |  |
| Fosl1 | no | down | no | up | no | up | yes | down |  |
| Habp2 | yes | up | no | up | no | up | yes | up |  |
| Tdrd1 | no | up | no | down | no | up | yes | up |  |
| Hspa12a | no | up | no | down | no | up | yes | up |  |
| Fgd1 | no | up | yes | down | no | up | yes | up |  |
| Padi4 | yes | up | no | up | no | down | yes | up |  |
| Itga7 | no | down | yes | down | no | up | yes | up |  |
| Muc2 | no | down | yes | down | no | down | yes | up |  |
| Fbxl16 | yes | up | no | up | no | down | yes | up |  |
| Nrp2 | no | up | no | down | no | up | yes | up |  |
| Sphkap | yes | up | no | down | no | up | yes | up |  |
| Igfbp5 | yes | up | no | down | no | up | yes | up |  |
| Ptprn | no | up | yes | down | no | down | yes | up |  |
| C4bp | yes | up | no | up | no | up | yes | up |  |
| Avpr1b | yes | up | no | down | no | up | yes | up |  |
| Slc45a3 | no | down | no | up | no | down | yes | down |  |
| Nfasc | yes | up | no | up | no | up | yes | up |  |
| Lmx1a | no | up | yes | down | no | down | yes | up |  |
| Vim | no | up | no | down | no | up | yes | up |  |
| Stxbp1 | yes | up | no | up | no | up | yes | up |  |
| Acvr1c | no | down | yes | down | no | down | yes | up |  |
| Grin1 | no | up | yes | down | no | up | yes | up |  |
| Il1rn | no | up | yes | up | no | up | yes | down |  |
| Slc43a1 | no | up | no | down | no | up | yes | up |  |
| Pax6 | no | up | yes | down | no | down | yes | up |  |
| Slc28a2 | yes | up | no | down | no | up | yes | up |  |
| Syt13 | yes | up | no | up | no | up | yes | up |  |
| Rassf2 | yes | up | no | up | no | up | yes | up |  |
| Chgb | yes | up | no | down | no | up | yes | up |  |
| Edn3 | no | up | yes | up | no | up | yes | down |  |
| Procr | no | down | no | up | no | down | yes | down |  |
| Dclk1 | no | up | no | down | no | up | yes | up |  |
| Tm4sf1 | yes | down | no | up | no | up | yes | down |  |
| Ptpn22 | yes | down | no | down | no | down | yes | down |  |
| Tspan2 | no | down | no | up | no | down | yes | down |  |
| Gask1b | yes | down | no | up | no | down | yes | down |  |
| Enpep | yes | down | no | down | no | down | yes | down |  |
| Ifi44 | yes | up | yes | up | no | down | yes | up |  |
| Thbs3 | no | up | no | down | no | up | yes | up |  |
| Pear1 | yes | down | no | up | no | up | yes | down |  |
| Riiad1 | no | down | yes | down | no | down | yes | up |  |
| Gbp3 | yes | up | yes | up | no | down | yes | up |  |
| Cga | yes | up | no | up | no | up | yes | up |  |
| Spink4 | no | up | no | down | no | up | yes | up |  |
| Aqp3 | yes | down | no | down | no | up | yes | down |  |
| Atp8b5 | no | up | no | down | no | up | yes | up |  |
| Tpm2 | yes | down | no | down | no | down | yes | down |  |
| Cyp4a14 | no | down | yes | up | no | up | yes | down |  |
| Kif17 | no | up | no | down | no | up | yes | up |  |
| Hspg2 | no | down | yes | down | no | up | yes | up |  |
| Abcb1b | no | down | no | up | no | down | yes | down |  |
| Stk32b | yes | up | no | down | no | up | yes | up |  |
| Plb1 | yes | up | no | down | no | up | yes | up |  |
| Cwh43 | yes | down | no | up | no | down | yes | down |  |
| Gbp9 | yes | up | yes | up | no | up | yes | up |  |
| Cxcl9 | yes | up | yes | up | no | up | yes | up |  |
| Rimbp2 | yes | up | no | down | no | up | yes | up |  |
| Cyp2w1 | yes | down | yes | down | no | up | yes | down |  |
| Cyp3a13 | no | down | no | up | no | down | yes | down |  |
| Cald1 | no | up | yes | up | no | up | yes | down |  |
| Akr1b8 | yes | down | no | down | no | down | yes | down |  |
| Npy | no | down | no | up | no | down | yes | down |  |
| Tbxas1 | no | up | yes | down | no | up | yes | up |  |
| Gxylt2 | yes | up | yes | up | no | up | yes | up |  |
| Wnt7a | no | down | no | up | no | up | yes | down |  |
| Sspn | yes | up | no | up | no | down | yes | up |  |
| Itpr2 | no | up | no | down | no | up | yes | up |  |
| Cyp2b10 | yes | down | no | down | no | down | yes | down |  |
| Tdrd12 | no | up | yes | up | no | up | yes | down |  |
| Gm45837 | no | down | no | down | no | down | yes | down |  |
| Xylt1 | yes | up | no | up | no | up | yes | up |  |
| Pagr1a | no | down | yes | down | no | down | yes | up |  |
| Sez6l2 | no | up | no | down | no | up | yes | up |  |
| Hpx | no | down | no | up | no | down | yes | down |  |
| Chst15 | yes | up | no | up | no | up | yes | up |  |
| Acsm3 | yes | down | no | down | no | down | yes | down |  |
| Ano1 | yes | down | no | down | no | up | yes | down |  |
| Srpx2 | no | down | no | up | no | up | yes | down |  |
| Vsig1 | no | down | no | up | no | down | yes | down |  |
| Col4a1 | no | up | yes | up | no | up | yes | down |  |
| Col4a2 | no | up | yes | up | no | up | yes | down |  |
| Ptpn7 | yes | up | no | up | no | up | yes | up |  |
| Anxa10 | no | up | yes | up | no | up | yes | down |  |
| Irx3 | yes | up | no | down | no | up | yes | up |  |
| Gnao1 | yes | up | no | down | no | up | yes | up |  |
| Mt4 | yes | up | yes | up | no | up | yes | down |  |
| Jak3 | yes | up | no | up | no | up | yes | up |  |
| Hsd11b2 | yes | up | no | up | no | up | yes | up |  |
| Cryab | yes | down | no | up | no | up | yes | down |  |
| Apoa1 | no | down | no | up | no | up | yes | down |  |
| Scg3 | yes | up | no | up | no | down | yes | up |  |
| Rora | yes | up | no | up | no | down | yes | up |  |
| Cyp1a1 | yes | up | yes | up | no | up | yes | down |  |
| Hcn4 | yes | up | no | up | no | up | yes | up |  |
| Plod2 | no | up | no | down | no | down | yes | up |  |
| Rbp2 | yes | down | yes | down | no | down | yes | down |  |
| Ptgs2 | yes | down | no | up | no | down | yes | down |  |
| Ltf | yes | down | no | down | no | down | yes | down |  |
| Cck | no | up | no | down | no | up | yes | up |  |
| Rab6b | no | up | no | down | no | down | yes | up |  |
| Cd59a | no | up | no | down | no | up | yes | up |  |
| Mdfi | no | down | no | up | no | up | yes | down |  |
| Trpa1 | no | up | no | down | no | up | yes | up |  |
| Chrm1 | yes | up | no | down | no | up | yes | up |  |
| Alox12b | no | up | no | down | no | up | yes | up |  |
| Igdcc4 | yes | up | no | up | no | up | yes | up |  |
| Prr5l | no | down | yes | down | no | up | yes | up |  |
| Rspo4 | no | up | no | down | no | up | yes | up |  |
| Arhgef17 | no | up | no | down | no | up | yes | up |  |
| Ift57 | yes | up | no | up | no | down | yes | up |  |
| Mgll | no | down | yes | down | no | up | yes | up |  |
| Tpsg1 | no | down | yes | down | no | up | yes | up |  |
| AA467197 | no | down | yes | down | no | down | yes | up |  |
| Stk36 | yes | up | no | up | no | up | yes | up |  |
| Ptprm | no | up | no | down | no | up | yes | up |  |
| Tagap | yes | up | no | down | no | down | yes | up |  |
| Cplx1 | no | up | no | down | no | down | yes | up |  |
| Ano7 | no | down | yes | down | no | down | yes | up |  |
| Ramp1 | no | up | no | down | no | up | yes | up |  |
| Ifit1 | yes | up | yes | up | no | up | yes | up |  |
| Rasd2 | no | down | yes | down | no | up | yes | up |  |
| Fras1 | no | up | no | down | no | up | yes | up |  |
| Neurod1 | yes | up | no | up | no | down | yes | up |  |
| Gna15 | yes | down | no | down | no | down | yes | down |  |
| Unc13a | no | up | no | down | no | up | yes | up |  |
| Cxcl10 | yes | up | yes | up | no | up | yes | up |  |
| Sncb | yes | up | no | up | no | up | yes | up |  |
| Zfr2 | no | up | yes | down | no | down | yes | up |  |
| Parm1 | no | down | yes | down | no | up | yes | up |  |
| Dnai4 | no | up | no | down | no | down | yes | up |  |
| Arx | yes | up | no | down | no | up | yes | up |  |
| Pdzrn3 | yes | up | no | down | no | up | yes | up |  |
| Tgfbi | yes | up | yes | up | no | up | yes | down |  |
| Slc51a | yes | down | no | down | no | up | yes | down |  |
| Ggta1 | yes | down | no | up | no | up | yes | down |  |
| Ints6l | no | up | no | down | no | down | yes | up |  |
| Armh4 | yes | up | no | down | no | up | yes | up |  |
| Akp3 | yes | down | no | down | no | down | yes | down |  |
| Cysrt1 | yes | down | no | down | no | up | yes | down |  |
| Stag3 | yes | up | no | down | no | up | yes | up |  |
| Zcwpw1 | no | up | yes | down | no | down | yes | up |  |
| Lypd8l | no | up | yes | up | no | down | yes | down |  |
| Mgarp | yes | up | no | down | no | up | yes | up |  |
| Grhl3 | yes | down | no | up | no | down | yes | down |  |
| Mfsd2b | no | down | no | up | no | down | yes | down |  |
| Vgf | yes | up | no | down | no | up | yes | up |  |
| Shank2 | no | down | yes | down | no | up | yes | up |  |
| Vstm2l | yes | down | no | down | no | up | yes | down |  |
| Zfp365 | no | down | no | up | no | down | yes | down |  |
| A4gnt | no | up | yes | down | no | down | yes | up |  |
| Aox4 | no | up | no | down | no | up | yes | up |  |
| Kash5 | yes | up | no | down | no | up | yes | up |  |
| C1rl | yes | down | yes | down | no | down | yes | up |  |
| Rgs4 | yes | up | yes | up | no | up | yes | up |  |
| Sct | no | up | no | down | no | up | yes | up |  |
| Pakap | yes | up | no | down | no | up | yes | up |  |
| Gcnt1 | no | down | no | up | no | down | yes | down |  |
| Nrn1 | no | up | yes | down | no | down | yes | up |  |
| Itga9 | yes | up | no | up | no | up | yes | up |  |
| Pcsk1n | no | up | no | down | no | up | yes | up |  |
| Marchf4 | yes | up | no | up | no | down | yes | up |  |
| Dse | yes | down | no | up | no | down | yes | down |  |
| Rbms3 | yes | up | yes | up | no | up | yes | up |  |
| Ncoa7 | yes | up | no | up | no | up | yes | up |  |
| Saa3 | yes | up | yes | up | no | down | yes | up |  |
| Tph1 | yes | up | yes | down | no | up | yes | up |  |
| Cacna2d1 | yes | up | no | up | no | up | yes | up |  |
| Rgl3 | no | up | no | down | no | up | yes | up |  |
| Gbp7 | yes | up | yes | up | no | down | yes | up |  |
| Nxph4 | no | up | yes | down | no | up | yes | up |  |
| Elapor1 | no | up | no | down | no | up | yes | up |  |
| Ltb4r2 | no | down | no | up | no | up | yes | down |  |
| Plppr2 | no | down | yes | down | no | down | yes | up |  |
| Ppp1r14c | no | up | no | down | no | up | yes | up |  |
| Mill2 | yes | up | no | down | no | down | yes | up |  |
| Cmtm8 | no | up | no | down | no | down | yes | up |  |
| Ramp3 | yes | up | no | up | no | up | yes | up |  |
| Nbl1 | no | down | no | up | no | up | yes | down |  |
| Ankrd42 | no | up | no | down | no | down | yes | up |  |
| Nutm1 | no | down | no | up | no | down | yes | down |  |
| Iapp | yes | up | no | up | no | up | yes | up |  |
| Acacb | yes | up | no | up | no | up | yes | up |  |
| Klhdc8a | no | up | no | down | no | down | yes | up |  |
| Grk3 | no | up | yes | down | no | up | yes | up |  |
| Dlgap3 | no | up | no | down | no | up | yes | up |  |
| Radx | no | up | yes | down | no | up | yes | up |  |
| Dnal1 | yes | up | no | up | no | down | yes | up |  |
| Nek10 | no | up | no | down | no | up | yes | up |  |
| Xkr7 | no | up | no | down | no | up | yes | up |  |
| Nmnat2 | no | up | yes | up | no | up | yes | down |  |
| Tmem108 | no | up | yes | down | no | up | yes | up |  |
| Greb1l | yes | up | no | up | no | up | yes | up |  |
| Upk3b | no | down | yes | down | no | up | yes | up |  |
| Hpdl | yes | down | no | up | no | down | yes | down |  |
| Lor | no | up | yes | up | no | up | yes | down |  |
| 2510009E07Rik | yes | up | no | up | no | up | yes | up |  |
| Sptssb | yes | down | no | up | no | down | yes | down |  |
| Tmem221 | no | down | yes | down | no | down | yes | up |  |
| Kcns3 | no | up | yes | down | no | up | yes | up |  |
| Ccrl2 | yes | up | no | up | no | up | yes | up |  |
| Bcl2l15 | yes | down | no | down | no | down | yes | down |  |
| Tmem74b | yes | up | no | down | no | up | yes | up |  |
| Cxxc4 | yes | up | no | up | no | up | yes | up |  |
| Garem2 | no | up | no | down | no | up | yes | up |  |
| Fzd1 | no | up | no | down | no | up | yes | up |  |
| Syt16 | no | down | yes | up | no | up | yes | down |  |
| Sh3tc2 | no | down | yes | up | no | up | yes | down |  |
| Col27a1 | yes | up | no | up | no | up | yes | up |  |
| Ifit2 | yes | up | yes | up | no | down | yes | up |  |
| Igfals | yes | up | yes | up | no | up | yes | up |  |
| Chrm3 | no | up | no | down | no | up | yes | up |  |
| Rbp1 | yes | down | no | up | no | down | yes | down |  |
| Kcnk6 | yes | down | no | up | no | down | yes | down |  |
| Nexmif | no | down | yes | up | no | down | yes | down |  |
| Sh2d7 | no | up | no | down | no | down | yes | up |  |
| Sox18 | yes | up | yes | up | no | up | yes | down |  |
| Gjb4 | no | down | no | up | no | up | yes | down |  |
| Tent5b | no | up | yes | up | no | up | yes | down |  |
| Ltb4r1 | yes | down | no | down | no | down | yes | down |  |
| Tet1 | yes | up | no | up | no | up | yes | up |  |
| Mageh1 | yes | up | no | up | no | up | yes | up |  |
| Sned1 | yes | up | no | down | no | down | yes | up |  |
| Gm4737 | no | up | yes | down | no | down | yes | up |  |
| Amigo2 | no | up | no | down | no | down | yes | up |  |
| Fbxl13 | no | down | no | up | no | down | yes | down |  |
| Myof | yes | down | no | up | no | down | yes | down |  |
| Slc35e4 | yes | down | no | down | no | up | yes | down |  |
| Nlrp10 | no | up | no | down | no | up | yes | up |  |
| Klk6 | no | down | no | up | no | up | yes | down |  |
| Lgals3 | yes | down | no | up | no | up | yes | down |  |
| Il31ra | no | up | no | down | no | down | yes | up |  |
| Cldn8 | yes | down | yes | down | no | down | yes | up |  |
| Kcnb1 | no | up | no | down | no | up | yes | up |  |
| Scg2 | yes | up | no | up | no | up | yes | up |  |
| Gp1bb | yes | down | no | down | no | down | yes | down |  |
| Gprc5c | yes | up | no | up | no | up | yes | up |  |
| Ffar2 | yes | up | no | down | no | down | yes | up |  |
| Zfp52 | no | up | yes | up | no | down | yes | down |  |
| Tacstd2 | yes | down | no | up | no | down | yes | down |  |
| Fhad1 | no | up | yes | down | no | up | yes | up |  |
| H1f4 | no | down | yes | down | no | down | yes | up |  |
| Map1b | yes | up | no | up | no | down | yes | up |  |
| Gm609 | yes | up | yes | up | no | up | yes | up |  |
| Oas1f | yes | down | no | up | no | up | yes | down |  |
| Adgrg4 | yes | up | no | up | no | up | yes | up |  |
| Gm9929 | no | up | no | down | no | up | yes | up |  |
| Stum | no | up | no | down | no | up | yes | up |  |
| Krt15 | no | up | yes | up | no | down | yes | down |  |
| Syne3 | no | down | yes | down | no | up | yes | up |  |
| Ceacam10 | yes | up | no | up | no | up | yes | up |  |
| Slfn5 | yes | up | no | up | no | down | yes | up |  |
| Cadps | yes | up | no | down | no | down | yes | up |  |
| Slc8a1 | yes | up | no | down | no | up | yes | up |  |
| Lrtm2 | no | up | no | down | no | down | yes | up |  |
| Zfp78 | no | up | no | down | no | up | yes | up |  |
| Kbtbd11 | yes | up | no | down | no | up | yes | up |  |
| Irs1 | yes | up | no | down | no | down | yes | up |  |
| Otulinl | yes | up | no | up | no | up | yes | up |  |
| Trim34a | yes | up | yes | up | no | down | yes | up |  |
| Ptprn2 | yes | up | no | up | no | up | yes | up |  |
| Dsg3 | yes | down | no | down | no | down | yes | down |  |
| Capg | yes | down | no | down | no | down | yes | down |  |
| Dnah9 | no | up | no | down | no | up | yes | up |  |
| Trim12c | yes | up | no | up | no | down | yes | up |  |
| Scn3a | no | up | no | down | no | down | yes | up |  |
| Olfr1459 | no | up | no | down | no | down | yes | up |  |
| Gm6169 | yes | down | no | down | no | down | yes | down |  |
| Gsta2 | yes | down | yes | down | no | down | yes | down |  |
| Gm5431 | yes | up | yes | up | no | up | yes | up |  |
| Defa39 | no | up | yes | down | no | down | yes | up |  |
| Kcnc1 | yes | up | no | up | no | down | yes | up |  |
| 1500035N22Rik | no | down | yes | down | no | down | yes | up |  |
| Krt4 | yes | down | no | down | no | up | yes | down |  |
| Tmem40 | no | down | no | up | no | up | yes | down |  |
| Defa26 | yes | up | no | up | no | down | yes | up |  |
| Defa17 | yes | up | no | down | no | up | yes | up |  |
| Pyroxd2 | yes | down | yes | down | no | down | yes | up |  |
| H2-Q7 | yes | up | no | up | no | up | yes | up |  |
| Ang4 | yes | up | yes | up | no | up | yes | up |  |
| Slc38a11 | no | up | no | down | no | down | yes | up |  |
| H4c4 | no | down | no | up | no | down | yes | down |  |
| Pclo | yes | up | no | up | no | up | yes | up |  |
| Tac1 | no | up | yes | down | no | up | yes | up |  |
| Defa35 | yes | up | no | down | no | up | yes | up |  |
| Defa38 | no | up | yes | down | no | down | yes | up |  |
| Ppef1 | no | up | yes | up | no | down | yes | down |  |
| Fmr1nb | yes | down | no | up | no | down | yes | down |  |
| Ifit3b | yes | up | yes | up | no | up | yes | up |  |
| Tcp11 | no | up | no | down | no | up | yes | up |  |
| Msln | yes | down | no | up | no | up | yes | down |  |
| Kcnma1 | no | up | no | down | no | up | yes | up |  |
| Defa34 | yes | up | no | up | no | down | yes | up |  |
| Arhgap22 | no | down | no | up | no | down | yes | down |  |
| Aox1 | no | down | no | up | no | down | yes | down |  |
| Amd2 | no | down | no | up | no | down | yes | down |  |
| Fbln2 | no | up | no | down | no | down | yes | up |  |
| Izumo1 | yes | up | no | down | no | up | yes | up |  |
| Ghrl | no | up | no | down | no | up | yes | up |  |
| Defa24 | yes | up | no | down | no | up | yes | up |  |
| Insyn1 | yes | up | no | up | no | up | yes | up |  |
| Fxyd6 | yes | up | no | down | no | up | yes | up |  |
| Serpinb5 | no | down | no | up | no | down | yes | down |  |
| Ppp1r3c | yes | up | no | up | no | down | yes | up |  |
| Myl9 | no | up | yes | down | no | up | yes | up |  |
| Gm10232 | no | down | no | up | no | up | yes | down |  |
| Shroom4 | no | up | no | down | no | up | yes | up |  |
| Zfp467 | no | down | yes | down | no | up | yes | up |  |
| Efcab1 | yes | up | no | up | no | up | yes | up |  |
| Cd59b | no | up | no | down | no | up | yes | up |  |
| Flnc | yes | down | no | up | no | up | yes | down |  |
| Selenbp2 | no | down | yes | down | no | down | yes | up |  |
| Lyz1 | yes | up | no | down | no | up | yes | up |  |
| Irgm2 | yes | up | no | up | no | up | yes | up |  |
| 9930111J21Rik2 | no | up | no | down | no | down | yes | up |  |
| Fcho1 | no | up | no | down | no | up | yes | up |  |
| Ceacam20 | no | down | yes | down | no | down | yes | up |  |
| Tmem139 | no | down | yes | down | no | down | yes | up |  |
| Adam4 | no | down | no | up | no | down | yes | down |  |
| Gm10505 | yes | up | no | up | no | down | yes | up |  |
| Pappa2 | yes | up | no | down | no | up | yes | up |  |
| Gsta5 | yes | down | no | down | no | down | yes | down |  |
| Gsta1 | yes | down | no | down | no | down | yes | down |  |
| Defa29 | no | down | yes | down | no | up | yes | up |  |
| Defa5 | yes | up | no | down | no | up | yes | up |  |
| Defa3 | yes | up | no | down | no | up | yes | up |  |
| Defa40 | no | up | no | down | no | up | yes | up |  |
| Defa22 | yes | up | yes | down | no | down | yes | up |  |
| Defa30 | yes | up | no | down | no | up | yes | up |  |
| Defa23 | yes | up | no | down | no | up | yes | up |  |
| Defa21 | yes | up | yes | down | no | down | yes | up |  |
| Arhgap40 | no | down | no | up | no | up | yes | down |  |
| 3110070M22Rik | yes | down | no | down | no | down | yes | down |  |
| Slc4a11 | yes | down | no | down | no | up | yes | down |  |
| Ifit3 | yes | up | yes | up | no | down | yes | up |  |
| Ano3 | yes | down | no | down | no | down | yes | down |  |
| Fjx1 | yes | up | no | up | no | up | yes | up |  |
| Cd80 | no | down | no | up | no | down | yes | down |  |
| 4930594M22Rik | no | down | no | up | no | down | yes | down |  |
| Ly6a | no | down | no | up | no | up | yes | down |  |
| Cntd1 | no | up | no | down | no | down | yes | up |  |
| Gm14288 | no | up | no | down | no | down | yes | up |  |
| Tgtp2 | yes | up | no | up | no | up | yes | up |  |
| Tgtp1 | yes | up | no | up | no | down | yes | up |  |
| Kcnip3 | no | up | no | down | no | up | yes | up |  |
| Defa41 | no | up | no | down | no | down | yes | up |  |
| Tlr5 | yes | down | yes | down | no | up | yes | up |  |
| Ifit1bl1 | yes | up | yes | up | no | down | yes | up |  |
| Alpi | yes | down | no | down | no | down | yes | down |  |
| Gm5138 | no | down | yes | down | no | down | yes | up |  |
| Reg3a | yes | down | yes | down | no | down | yes | up |  |
| Xlr4a | yes | up | no | down | no | up | yes | up |  |
| Gm12161 | yes | down | no | down | no | down | yes | down |  |
| Rpl35a-ps2 | no | no change | yes | up | no | no change | yes | down |  |
| Gm15821 | yes | up | no | up | no | down | yes | up |  |
| Pgam1-ps2 | yes | up | no | no change | no | no change | yes | up |  |
| Sycn | no | up | no | down | no | up | yes | up |  |
| Gm16185 | no | down | yes | down | no | down | yes | up |  |
| Gm15927 | no | up | no | down | no | down | yes | up |  |
| Gm15234 | no | up | no | down | no | down | yes | up |  |
| A430018G15Rik | no | up | yes | down | no | down | yes | up |  |
| 6430710C18Rik | no | up | yes | up | no | down | yes | down |  |
| Gm11697 | yes | down | no | down | no | down | yes | down |  |
| Gm16046 | yes | up | no | up | no | up | yes | up |  |
| Gm13830 | yes | up | no | up | no | down | yes | up |  |
| Gm13663 | yes | up | yes | up | no | down | yes | up |  |
| Gm15848 | yes | up | no | down | no | down | yes | up |  |
| Gm15672 | no | up | no | down | no | up | yes | up |  |
| BC064078 | yes | up | no | up | no | down | yes | up |  |
| Gm6483 | yes | up | no | down | no | up | yes | up |  |
| E030042O20Rik | yes | up | no | down | no | down | yes | up |  |
| Gm13652 | no | down | no | up | no | down | yes | down |  |
| Gm16008 | no | up | no | down | no | down | yes | up |  |
| Gm16576 | yes | up | no | up | no | down | yes | up |  |
| Gm23547 | yes | up | no | up | no | up | yes | up |  |
| Slc25a5-ps | no | down | no | up | no | up | yes | down |  |
| Cdk5r2 | no | up | no | down | no | up | yes | up |  |
| Gm17024 | no | up | no | down | no | up | yes | up |  |
| Zfp712 | no | up | no | down | no | down | yes | up |  |
| Vgll3 | no | down | no | up | no | down | yes | down |  |
| Gm17167 | no | up | no | down | no | down | yes | up |  |
| Sec14l5 | no | down | no | up | no | up | yes | down |  |
| C2cd4b | no | up | no | down | no | up | yes | up |  |
| Gm17139 | yes | down | no | down | no | down | yes | down |  |
| Kcnb2 | yes | up | no | up | no | up | yes | up |  |
| Gm20422 | no | down | no | up | no | down | yes | down |  |
| Gal3st2b | no | down | yes | down | no | up | yes | up |  |
| Tmem181c-ps | no | down | no | up | no | down | yes | down |  |
| Gm21885 | yes | down | yes | down | no | down | yes | down |  |
| Defa33 | yes | up | no | down | no | down | yes | up |  |
| Gm21451 | yes | up | yes | up | no | no change | yes | up |  |
| Gm21972 | no | down | no | up | no | down | yes | down |  |
| Defa36 | yes | up | no | up | no | down | yes | up |  |
| Defa32 | yes | up | no | down | no | down | yes | up |  |
| Defa20 | yes | up | no | down | no | down | yes | up |  |
| Itpripl2 | no | down | no | up | no | up | yes | down |  |
| Plac9a | yes | down | no | down | no | up | yes | down |  |
| Pramel43 | no | down | yes | up | no | down | yes | down |  |
| Gm21983 | yes | up | no | up | no | down | yes | up |  |
| Rab11b-ps2 | yes | up | no | no change | no | no change | yes | up |  |
| Tpbgl | yes | down | no | down | no | up | yes | down |  |
| 3300005D01Rik | no | down | no | up | no | up | yes | down |  |
| A930029G22Rik | no | up | no | down | no | down | yes | up |  |
| Gm26714 | no | up | yes | up | no | up | yes | down |  |
| F630040K05Rik | no | up | no | down | no | up | yes | up |  |
| Gm26810 | no | up | no | down | no | up | yes | up |  |
| Ptprv | yes | up | yes | up | no | up | yes | up |  |
| Gm2445 | no | up | no | down | no | down | yes | up |  |
| Gm27235 | yes | up | no | up | no | up | yes | up |  |
| Tcf24 | yes | down | yes | down | no | down | yes | up |  |
| Gm28800 | no | up | no | down | no | up | yes | up |  |
| Gm20687 | no | up | no | down | no | up | yes | up |  |
| Gm28192 | no | up | no | down | no | down | yes | up |  |
| Gm9775 | no | up | no | down | no | down | yes | up |  |
| 4930447F24Rik | no | up | yes | down | no | up | yes | up |  |
| Gm37233 | yes | up | no | up | no | down | yes | up |  |
| Gm29856 | no | down | yes | down | no | down | yes | up |  |
| Gm37570 | no | up | no | down | no | down | yes | up |  |
| Gm38253 | no | up | no | down | no | down | yes | up |  |
| Pcdhgb1 | yes | up | no | up | no | up | yes | up |  |
| Gm38150 | no | down | no | up | no | down | yes | down |  |
| Gm10657 | no | up | no | down | no | up | yes | up |  |
| Gm38220 | no | up | no | down | no | up | yes | up |  |
| Gm37206 | no | up | no | down | no | down | yes | up |  |
| Gm38250 | yes | up | no | up | no | up | yes | up |  |
| Gm37988 | no | up | no | down | no | up | yes | up |  |
| Gm37691 | no | down | yes | down | no | down | yes | up |  |
| Gm37660 | yes | down | no | down | no | down | yes | down |  |
| Gm38065 | no | up | no | down | no | down | yes | up |  |
| Gm37110 | yes | up | no | down | no | down | yes | up |  |
| Gm43421 | no | up | no | down | no | down | yes | up |  |
| Gm42927 | yes | up | yes | up | no | up | yes | up |  |
| 5330426L24Rik | no | down | yes | down | no | down | yes | up |  |
| Gm43080 | yes | up | no | down | no | down | yes | up |  |
| Gm42664 | yes | up | no | down | no | up | yes | up |  |
| B230303O12Rik | no | down | yes | down | no | down | yes | up |  |
| Gm43747 | no | up | no | down | no | down | yes | up |  |
| Gm43634 | no | no change | no | up | no | up | yes | down |  |
| Gm42549 | yes | up | no | down | no | down | yes | up |  |
| Gm44183 | yes | down | no | up | no | down | yes | down |  |
| Gm44386 | no | up | no | down | no | up | yes | up |  |
| B130021K23Rik | no | up | no | down | no | down | yes | up |  |
| Gm43890 | yes | up | no | up | no | down | yes | up |  |
| Gm44067 | no | up | no | down | no | down | yes | up |  |
| Gm45221 | no | up | no | down | no | down | yes | up |  |
| Gm45745 | yes | up | no | up | no | down | yes | up |  |
| Gm49369 | no | up | no | down | no | down | yes | up |  |
| Gm45844 | no | up | no | down | no | down | yes | up |  |
| Gm45785 | yes | up | no | no change | no | no change | yes | up |  |
| Pde2a | no | down | yes | down | no | up | yes | up |  |
| Gm32742 | yes | up | no | up | no | up | yes | up |  |
| Gm45457 | yes | up | no | up | no | down | yes | up |  |
| Gm5159 | yes | up | no | down | no | down | yes | up |  |
| Gm47963 | no | up | no | down | no | down | yes | up |  |
| Gm7435 | yes | up | no | down | no | down | yes | up |  |
| Gm49373 | no | up | yes | up | no | up | yes | down |  |
| Gm3776 | yes | down | no | down | no | down | yes | down |  |
| Gm47956 | no | up | no | down | no | down | yes | up |  |
| Gm48278 | no | up | no | down | no | down | yes | up |  |
| Gm47611 | no | up | no | down | no | up | yes | up |  |
| Gm4129 | yes | down | no | down | no | down | yes | down |  |
| Gm47761 | no | up | yes | down | no | down | yes | up |  |
| Gm36283 | yes | up | yes | up | no | down | yes | up |  |
| Gm47467 | no | up | no | down | no | down | yes | up |  |
| Gm48541 | no | up | no | down | no | down | yes | up |  |
| Gm47806 | yes | up | no | up | no | up | yes | up |  |
| Gm48113 | yes | up | no | no change | no | no change | yes | up |  |
| Gm36738 | no | up | no | down | no | up | yes | up |  |
| Lncppara | yes | down | yes | down | no | up | yes | up |  |
| Gm46560 | no | up | no | down | no | down | yes | up |  |
| Gm49769 | no | down | no | up | no | down | yes | down |  |
| Gm50336 | no | down | no | up | no | down | yes | down |  |
| Gm50210 | no | up | no | down | no | down | yes | up |  |
| Gm50358 | yes | up | no | down | no | up | yes | up |  |
| Vmn1r55 | no | up | no | down | no | down | yes | up |  |
| Muc4 | no | up | no | down | no | up | yes | up |  |
| Rn7s2 | no | up | no | down | no | down | yes | up |  |
| Rn7s1 | no | up | no | down | no | down | yes | up |  |
|  | no | down | no | up | no | down | yes | down |  |

**Supplementary Table 2**. The associated annotated genes in enriched KEGG pathways.

| Enriched pathways | Annotated genes |
| --- | --- |
| Staphylococcus aureus infection | Krt15  Defa39  Defa26  Defa17  Defa35  Defa38  Defa34  Defa24  Defa29  Defa5  Defa3  Defa40  Defa22  Defa30  Defa23  Defa21  Defa41  Defa32  Defa20 |
| NOD-like receptor signaling | Sting1  Gbp3  Itpr2  Gbp7  Defa39  Defa26  Defa17  Defa35  Defa38  Defa34  Defa24  Defa29  Defa5  Defa3  Defa40  Defa22  Defa30  Defa23  Defa21  Defa41  Defa32  Defa20 |
| Transcriptional misregulation in cancer | Etv1  Runx1t1  Slc45a3  Defa39  Defa26  Defa17  Defa35  Defa38  Defa34  Defa24  Defa29  Defa5  Defa3  Defa40  Defa22  Defa30  Defa23  Defa21  Defa41  H3c14  Defa32  Defa20 |
